# Supplementary material for: Microscopy and genomic analysis of Mycoplasma parvum strain Indiana
Source: PubMed Central journal article supplement (PMC4423628; doi:10.1186/s13567-014-0086-7), 2014-08-13

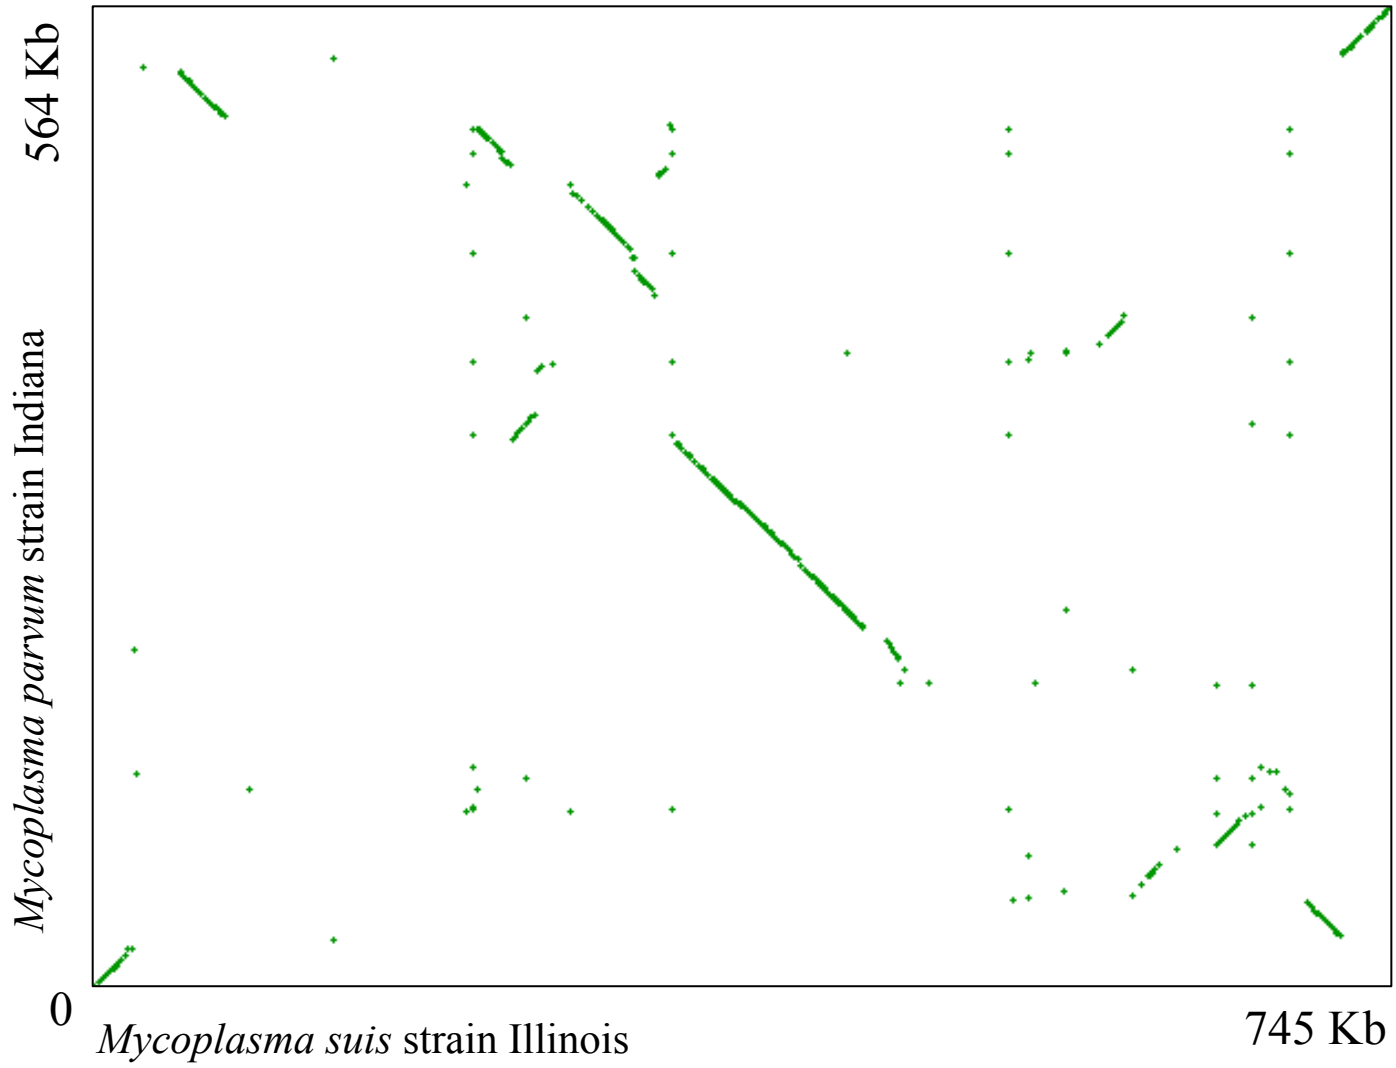

Supplement: 13567_2014_86_MOESM1_ESM.pdf [file 13567_2014_86_MOESM1_ESM.pdf]
