# Supplementary material for: Microscopy and genomic analysis of Mycoplasma parvum strain Indiana
Source: PubMed Central journal article supplement (PMC4423628; doi:10.1186/s13567-014-0086-7), 2014-08-13
Supplement: 13567_2014_86_MOESM2_ESM.pdf [file 13567_2014_86_MOESM2_ESM.pdf]

| Unique CDSs in<br>paralogous<br>families/Analyses | PSORTb                   |                      |             |               |                  |                    |                    |                |          |           |          |          |          |
|---------------------------------------------------|--------------------------|----------------------|-------------|---------------|------------------|--------------------|--------------------|----------------|----------|-----------|----------|----------|----------|
|                                                   | Subcellular localization |                      |             |               | Features         |                    |                    |                | SignalP  |           | LipoP    |          |          |
|                                                   | Unknown                  | Cytoplasmic Membrane | Cytoplasmic | Extracellular | 1 internal helix | 2 internal helices | 3 internal helices | Signal peptide | YES      | NO        | SpI      | SpII     | TMH      |
| <b><i>M. parvum</i> strain Indiana</b>            |                          |                      |             |               |                  |                    |                    |                |          |           |          |          |          |
| Family 1 (12 CDSs)                                | 5                        | 0                    | 7           | 0             | 1                | 0                  | 0                  | 0              | 0        | 12        | 3        | 1        | 0        |
| Family 2 (9 CDSs)                                 | 3                        | 0                    | 6           | 0             | 0                | 0                  | 0                  | 0              | 9        | 0         | 0        | 0        | 0        |
| Family 4 (6 CDSs)                                 | 4                        | 0                    | 2           | 0             | 4                | 0                  | 0                  | 0              | 6        | 3         | 0        | 2        | 0        |
| Family 7 (5 CDSs)                                 | 3                        | 0                    | 2           | 0             | 0                | 0                  | 0                  | 0              | 5        | 0         | 0        | 0        | 0        |
| Family 8 (5 CDSs)                                 | 5                        | 0                    | 0           | 0             | 4                | 0                  | 0                  | 0              | 5        | 1         | 0        | 0        | 0        |
| Family 11 (4 CDSs)                                | 3                        | 0                    | 1           | 0             | 4                | 0                  | 0                  | 0              | 4        | 0         | 0        | 0        | 0        |
| Family 12 (4 CDSs)                                | 3                        | 0                    | 1           | 0             | 0                | 0                  | 0                  | 0              | 4        | 0         | 0        | 0        | 0        |
| Family 19 (3 CDSs)                                | 0                        | 0                    | 3           | 0             | 1                | 0                  | 0                  | 0              | 3        | 0         | 0        | 0        | 0        |
| Family 22 (3 CDSs)                                | 1                        | 0                    | 1           | 1             | 1                | 0                  | 0                  | 0              | 3        | 0         | 0        | 0        | 0        |
| Family 24 (3 CDSs)                                | 3                        | 0                    | 0           | 0             | 2                | 0                  | 0                  | 0              | 3        | 0         | 0        | 0        | 0        |
| Family 28 (2 CDSs)                                | 2                        | 0                    | 0           | 0             | 0                | 0                  | 0                  | 0              | 2        | 0         | 0        | 0        | 0        |
| Family 30 (2 CDSs)                                | 1                        | 1                    | 0           | 0             | 2                | 0                  | 0                  | 0              | 2        | 1         | 0        | 1        | 0        |
| Family 31 (2 CDSs)                                | 1                        | 1                    | 0           | 0             | 1                | 0                  | 0                  | 0              | 2        | 0         | 0        | 0        | 0        |
| Family 32 (2 CDSs)                                | 2                        | 0                    | 0           | 0             | 0                | 0                  | 1                  | 0              | 2        | 1         | 0        | 0        | 0        |
| Family 35 (2 CDSs)                                | 1                        | 1                    | 0           | 0             | 0                | 0                  | 0                  | 0              | 2        | 0         | 0        | 0        | 0        |
| <b>Total (64)</b>                                 | <b>37</b>                | <b>3</b>             | <b>23</b>   | <b>1</b>      | <b>20</b>        | <b>0</b>           | <b>0</b>           | <b>1</b>       | <b>0</b> | <b>64</b> | <b>9</b> | <b>1</b> | <b>3</b> |
| <b><i>M. suis</i> strain Illinois</b>             |                          |                      |             |               |                  |                    |                    |                |          |           |          |          |          |
| Family 1 (37 CDSs)                                | 24                       | 4                    | 9           | 0             | 35               | 0                  | 0                  | 6              | 1        | 36        | 8        | 0        | 8        |
| Family 7 (11 CDSs)                                | 5                        | 0                    | 5           | 1             | 6                | 0                  | 0                  | 0              | 11       | 2         | 0        | 0        | 0        |
| Family 10 (9 CDSs)                                | 7                        | 0                    | 2           | 0             | 5                | 0                  | 0                  | 3              | 9        | 5         | 1        | 2        | 0        |
| Family 11 (9 CDSs)                                | 5                        | 1                    | 3           | 0             | 9                | 0                  | 0                  | 1              | 9        | 2         | 0        | 0        | 0        |
| Family 14 (8 CDSs)                                | 8                        | 0                    | 0           | 0             | 0                | 0                  | 0                  | 0              | 8        | 0         | 0        | 0        | 0        |
| Family 16 (7 CDSs)                                | 3                        | 0                    | 3           | 1             | 6                | 0                  | 0                  | 0              | 7        | 2         | 0        | 1        | 0        |
| Family 17 (6 CDSs)                                | 3                        | 0                    | 3           | 0             | 6                | 0                  | 0                  | 0              | 6        | 3         | 0        | 0        | 0        |
| Family 18 (6 CDSs)                                | 6                        | 0                    | 0           | 0             | 3                | 0                  | 0                  | 1              | 3        | 3         | 0        | 0        | 0        |
| Family 19 (6 CDSs)                                | 4                        | 2                    | 0           | 0             | 5                | 0                  | 0                  | 0              | 5        | 4         | 0        | 0        | 0        |
| Family 22 (5 CDSs)                                | 3                        | 0                    | 2           | 0             | 4                | 0                  | 0                  | 0              | 5        | 5         | 0        | 3        | 0        |
| Family 23 (5 CDSs)                                | 3                        | 0                    | 2           | 0             | 3                | 0                  | 0                  | 1              | 5        | 1         | 0        | 0        | 0        |
| Family 24 (5 CDSs)                                | 3                        | 0                    | 0           | 2             | 5                | 0                  | 0                  | 2              | 5        | 3         | 0        | 3        | 0        |
| Family 27 (4 CDSs)                                | 3                        | 0                    | 0           | 1             | 4                | 0                  | 0                  | 0              | 4        | 2         | 0        | 0        | 0        |
| Family 28 (4 CDSs)                                | 4                        | 0                    | 0           | 0             | 4                | 0                  | 0                  | 2              | 4        | 0         | 0        | 0        | 0        |
| Family 30 (4 CDSs)                                | 3                        | 1                    | 0           | 0             | 2                | 0                  | 0                  | 1              | 3        | 2         | 0        | 1        | 0        |
| Family 32 (4 CDSs)                                | 3                        | 1                    | 0           | 0             | 4                | 0                  | 0                  | 0              | 4        | 0         | 0        | 0        | 0        |
| Family 33 (4 CDSs)                                | 3                        | 0                    | 0           | 1             | 4                | 0                  | 0                  | 3              | 4        | 2         | 0        | 1        | 0        |
| Family 36 (3 CDSs)                                | 1                        | 1                    | 1           | 0             | 3                | 0                  | 0                  | 0              | 3        | 0         | 0        | 0        | 0        |
| Family 37 (3 CDSs)                                | 1                        | 0                    | 2           | 0             | 2                | 0                  | 0                  | 1              | 2        | 2         | 0        | 1        | 0        |
| Family 38 (3 CDSs)                                | 0                        | 0                    | 3           | 0             | 3                | 0                  | 0                  | 0              | 3        | 1         | 0        | 1        | 0        |
| Family 39 (3 CDSs)                                | 3                        | 0                    | 0           | 0             | 3                | 0                  | 0                  | 0              | 3        | 0         | 0        | 0        | 0        |
| Family 40 (3 CDSs)                                | 1                        | 0                    | 2           | 0             | 1                | 0                  | 0                  | 0              | 3        | 0         | 0        | 0        | 0        |

|                    |            |           |           |          |            |          |          |           |          |            |           |          |           |
|--------------------|------------|-----------|-----------|----------|------------|----------|----------|-----------|----------|------------|-----------|----------|-----------|
| Family 41 (3 CDSs) | 2          | 0         | 0         | 1        | 3          | 0        | 0        | 2         | 0        | 3          | 2         | 0        | 2         |
| Family 42 (3 CDSs) | 1          | 1         | 1         | 0        | 3          | 0        | 0        | 0         | 0        | 3          | 1         | 0        | 0         |
| Family 43 (3 CDSs) | 3          | 0         | 0         | 0        | 3          | 0        | 0        | 0         | 0        | 3          | 2         | 0        | 0         |
| Family 46 (2 CDSs) | 1          | 0         | 0         | 1        | 2          | 0        | 0        | 0         | 0        | 2          | 2         | 0        | 1         |
| Family 48 (2 CDSs) | 1          | 0         | 1         | 0        | 2          | 0        | 0        | 0         | 0        | 2          | 0         | 0        | 0         |
| Family 50 (2 CDSs) | 2          | 0         | 0         | 0        | 2          | 0        | 0        | 0         | 0        | 2          | 0         | 0        | 0         |
| Family 53 (2 CDSs) | 2          | 0         | 0         | 0        | 2          | 0        | 0        | 0         | 0        | 2          | 1         | 0        | 1         |
| Family 54 (2 CDSs) | 1          | 0         | 1         | 0        | 0          | 0        | 0        | 0         | 0        | 2          | 0         | 0        | 0         |
| Family 56 (2 CDSs) | 2          | 0         | 0         | 0        | 2          | 0        | 0        | 2         | 0        | 2          | 1         | 0        | 0         |
| Family 57 (2 CDSs) | 1          | 0         | 1         | 0        | 2          | 0        | 0        | 1         | 0        | 2          | 1         | 0        | 1         |
| Family 58 (2 CDSs) | 2          | 0         | 0         | 0        | 2          | 0        | 0        | 0         | 0        | 2          | 0         | 0        | 0         |
| Family 59 (2 CDSs) | 2          | 0         | 0         | 0        | 1          | 0        | 0        | 0         | 0        | 2          | 1         | 0        | 0         |
| Family 60 (2 CDSs) | 2          | 0         | 0         | 0        | 2          | 0        | 0        | 2         | 0        | 2          | 2         | 0        | 0         |
| Family 61 (2 CDSs) | 2          | 0         | 0         | 0        | 1          | 0        | 0        | 1         | 0        | 2          | 1         | 0        | 0         |
| Family 62 (2 CDSs) | 1          | 0         | 1         | 0        | 2          | 0        | 0        | 0         | 0        | 2          | 2         | 0        | 2         |
| Family 63 (2 CDSs) | 1          | 1         | 0         | 0        | 2          | 0        | 0        | 0         | 0        | 2          | 0         | 0        | 0         |
| Family 65 (2 CDSs) | 2          | 0         | 0         | 0        | 2          | 0        | 0        | 1         | 0        | 2          | 2         | 0        | 1         |
| Family 66 (2 CDSs) | 2          | 0         | 0         | 0        | 2          | 0        | 0        | 1         | 0        | 2          | 0         | 0        | 0         |
| <b>Total (188)</b> | <b>125</b> | <b>12</b> | <b>43</b> | <b>8</b> | <b>153</b> | <b>0</b> | <b>0</b> | <b>31</b> | <b>8</b> | <b>100</b> | <b>65</b> | <b>1</b> | <b>29</b> |

PSORTb: results were obtained using the output for Gram-negative bacteria without outer membrane.

SignalP: YES: signal peptide present, NO: signal peptide absent.

LipoP: SpI: signal peptide (signal peptidase I), SpII: lipoprotein signal peptide (signal peptidase II), TMH: n-terminal transmembrane helix. **Note from the software: TMH is generally not a very reliable prediction and should be tested. This part of the model is mainly there to avoid transmembrane helices being falsely predicted as signal peptides.**
